# Supplementary material for: Initiation of the ice phase by marine biogenic surfaces in supersaturated gas and supercooled aqueous phases
Source: Royal Society of Chemistry journal article supplement (doi:10.1039/c1cp21844a), 2011-01-01
Supplement: c1cp21844a.pdf [file c1cp21844a.pdf]

**Electronic Supplementary Information:**

**Initiation of the Ice Phase by Marine Biogenic Surfaces**

**in Supersaturated Gas and Supercooled Aqueous**

**Phases**

Peter A. Alpert,<sup>1</sup> Josephine Y. Aller,<sup>2</sup> and Daniel A. Knopf<sup>1,†</sup>

<sup>1</sup>Institute for Terrestrial and Planetary Atmospheres/  
School of Marine and Atmospheric Sciences, Stony Brook University,  
Stony Brook, New York, 11794-5000, USA.

<sup>2</sup>School of Marine and Atmospheric Sciences, Stony Brook University,  
Stony Brook, New York, 11794-5000, USA.

<sup>†</sup>*To whom correspondence should be addressed: Daniel.Knopf@stonybrook.edu*

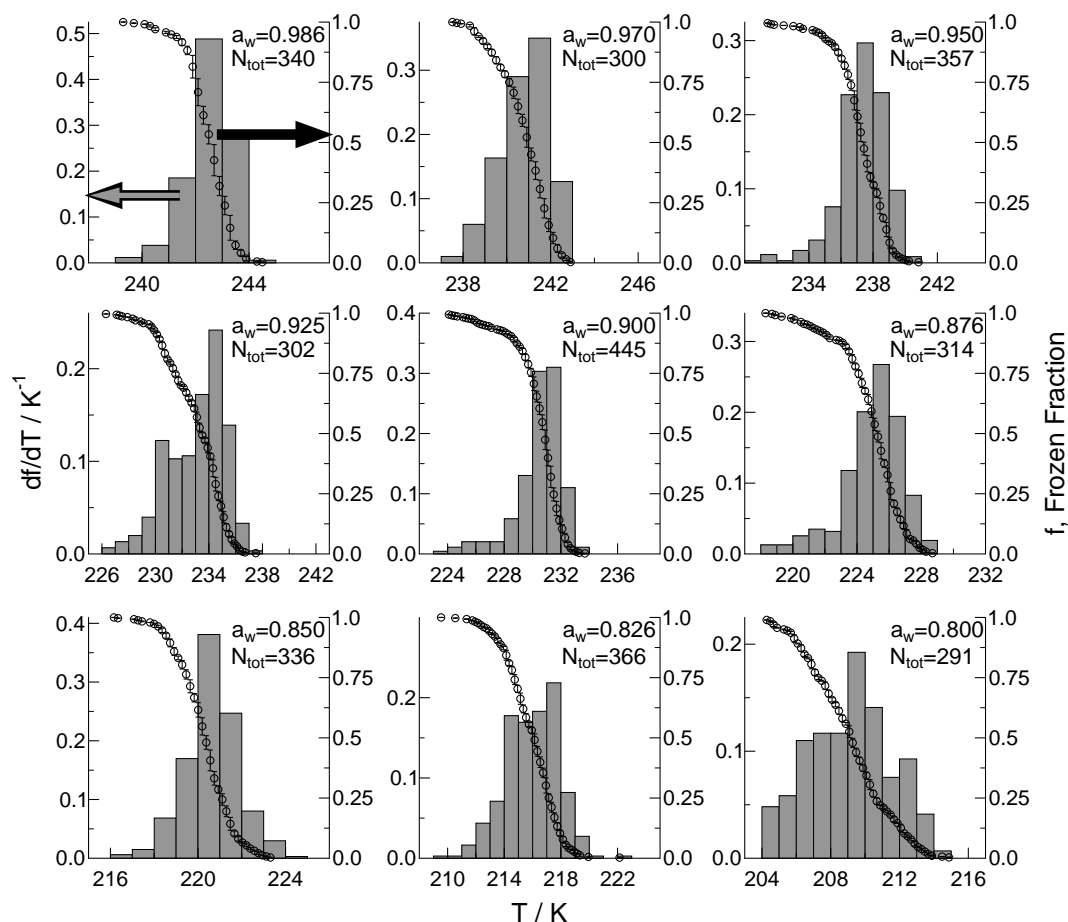

**Figure S1.** Summary of all observed immersion freezing events due to *N. atomus* cells as a function of  $a_w$  and  $T$ . The frozen fraction,  $f$ , of droplets in 0.2 K temperature increments is represented by black circles. Error bars indicate the range of  $f$  in a temperature increment of 0.2 K. Grey bars show the probability density histogram (PDH) binned in 1.0 K increments. For each panel,  $a_w$  and the total number of analysed droplets,  $N_{\text{tot}}$ , are given. The values for the PDH are given on the left y-axis and  $f$  on the right y-axis.

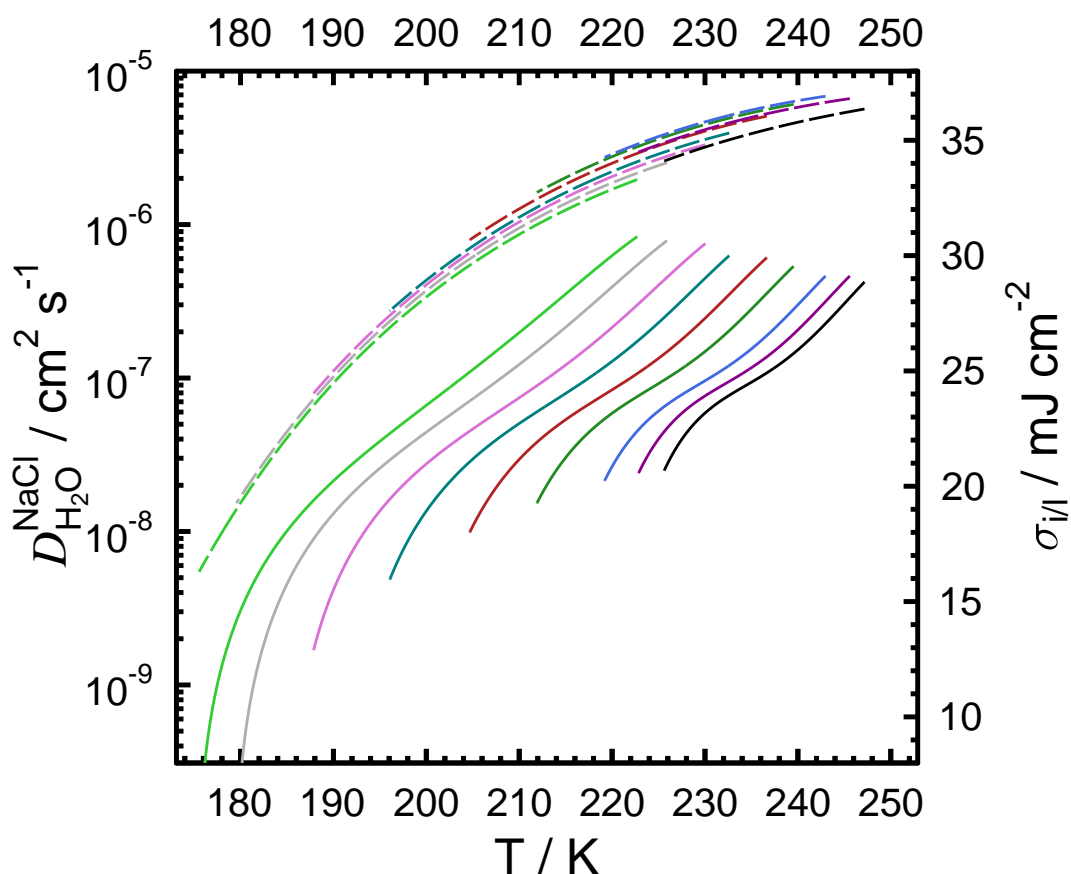

**Figure S2.** Thermodynamic variables employed in calculations of contact angles. In aqueous NaCl solution, the water diffusion coefficient,  $D_{\text{H}_2\text{O}}^{\text{NaCl}}$ , is given as dashed lines and the interfacial energy of ice,  $\sigma_{i/l}$ , is given by solid lines as a function of  $T$  and  $a_w$ .  $D_{\text{H}_2\text{O}}^{\text{NaCl}}$  is derived from Kim and Yethiraj<sup>1</sup> and extrapolated to lower  $T$ .  $\sigma_{i/l}^{\text{NaCl}}$  is derived from theoretical homogeneous ice nucleation rate coefficients<sup>2</sup> and employs  $D_{\text{H}_2\text{O}}^{\text{NaCl}}$ . Black, purple, blue, green, red, teal, magenta, grey, and lime colors correspond to a  $a_w$  of 0.986, 0.970, 0.950, 0.925, 0.900, 0.876, 0.850, 0.826, and 0.800.

## References

- [1] J. S. Kim and A. Yethiraj, *J. Phys. Chem. B*, 2008, **112**, 1729–1735.
- [2] T. Koop, B. P. Luo, A. Tsias and T. Peter, *Nature*, 2000, **406**, 611–614.
